# Supplementary material for: Putative critical quality attribute matrix identifies mesenchymal stromal cells with potent immunomodulatory and angiogenic “fitness” ranges in response to culture process parameters
Source: PubMed Central journal article supplement (PMC9747767; doi:10.3389/fimmu.2022.972095), 2022-11-30
Supplement: DataSheet_1.pdf [file DataSheet_1.pdf]

## Supplementary Material

### 1 Supplementary Figures:

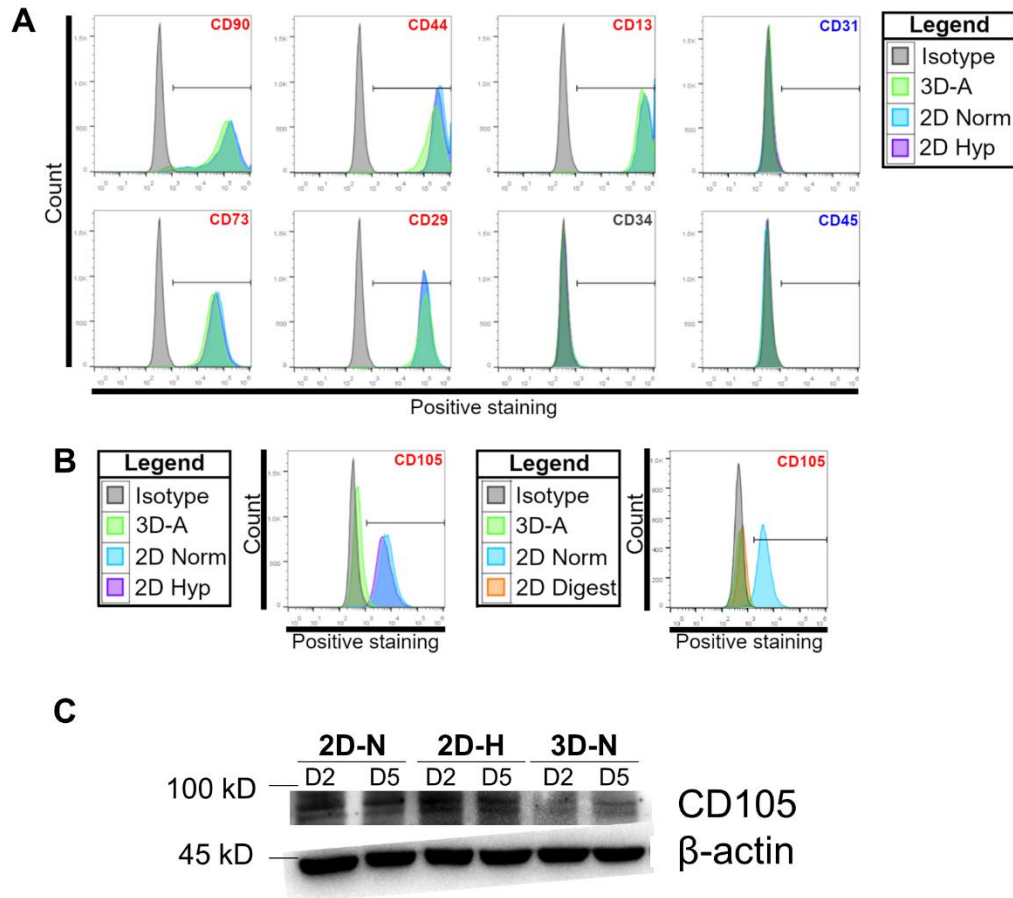

**Supplementary Figure 1. MSC(AT) cultured using 3D-N and 2D-H conditions satisfied surface marker expression criteria by IFATS and ISCT [42].** A) Single cell suspensions of MSC(AT) display expression of positive MSC(AT) markers (red font) and lack expression of the variable marker CD34 as well as hematopoietic markers (blue font). B) Enzymatic digestion conditions used for dissociating 3D-N MSC(AT) cleave CD105 from both 3D-N and 2D-N MSC(AT) (2D Digest condition in right plot). Representative plots from N=3 MSC(AT) donors (two donors from subcutaneous knee fat, one abdominal lipoaspirate donor). C) Western blot demonstrating expression of CD105 by MSC(AT) cultured using 2D-N, 2D-H, and 3D-N methods. N=2 donors. D: Donor, 3D-N: 3D Normoxic culture, 2D-N: 2D Normoxic culture, 2D-H: 2D Hypoxic culture.

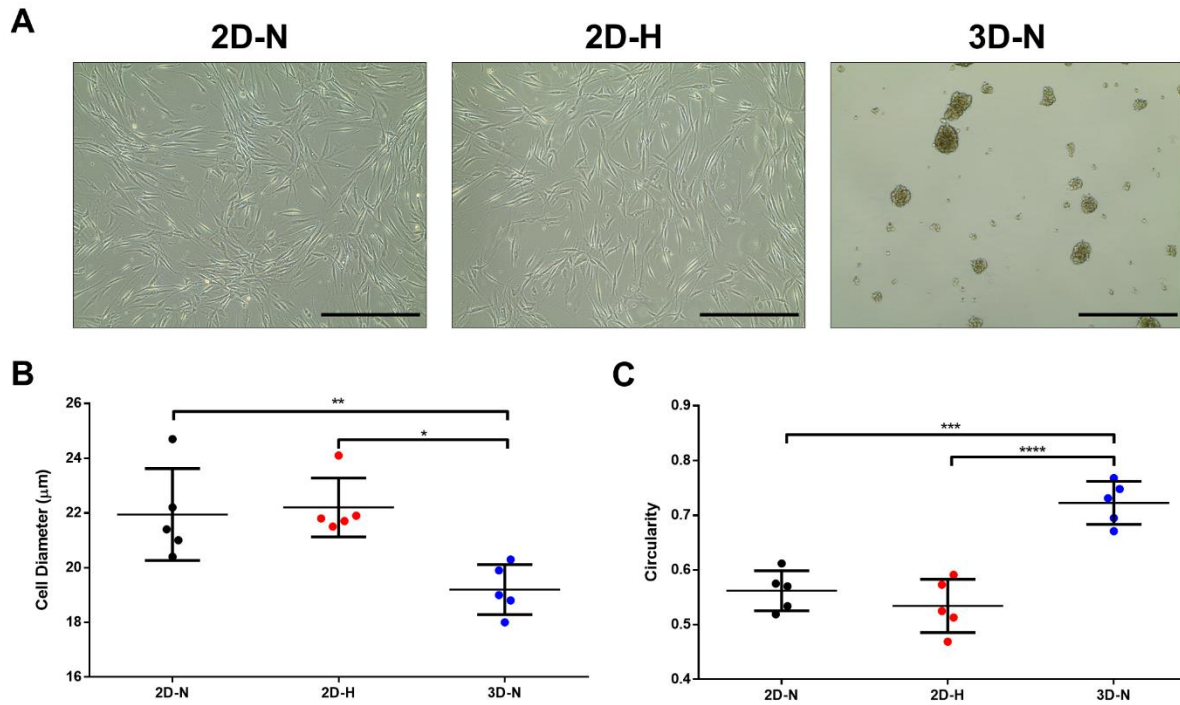

**Supplementary Figure 2. Morphometric characterization of MSC(AT) cultured under various CPP conditions known to enhance immunomodulatory and/or angiogenic MSC potency.** A) Representative photomicrographs of MSC(AT) cultured using each CPP. Scale bars: 500  $\mu\text{m}$ . B and C) Dissociated 3D aggregates showed reduced single cell diameter (B) and greater circularity (C) relative to 2D-N and 2D-H conditions. One-way ANOVA, Tukey post-hoc test. \* $p < 0.05$ , \*\* $p < 0.01$ , \*\*\* $p < 0.001$ , \*\*\*\* $p < 0.0001$ .  $N = 5$  MSC(AT) donors,  $n = 3$  technical replicates. Horizontal bars: group mean, error bars: standard deviation. 3D-N: 3D Normoxic culture, 2D-N: 2D Normoxic culture, 2D-H: 2D Hypoxic culture.

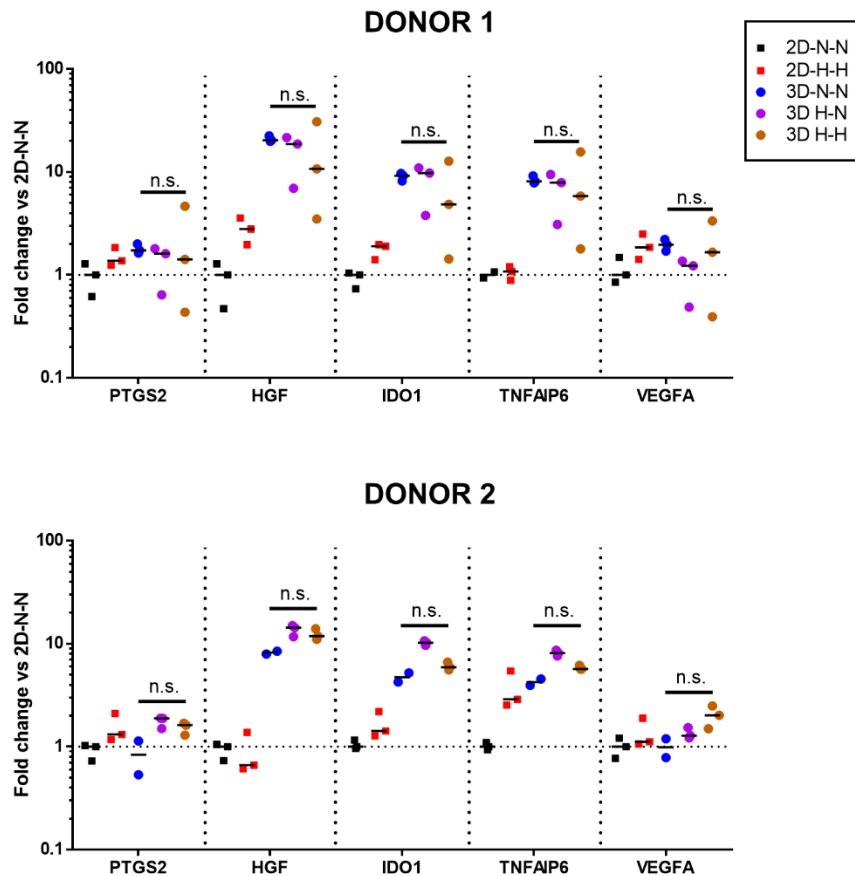

**Supplementary Figure 3. Gene expression analysis of licensed MSC(AT) demonstrated no advantage of combining 3D and hypoxic culture conditions.** Two MSC(AT) donors (D1 and D2) were cultured overnight (16-20 h) using 2D or 3D conditions with normoxic or hypoxic culture, followed by an additional 24 h of 2D or 3D culture in normoxic or hypoxic conditions with addition of pro-inflammatory licensing factors prior to harvesting samples for gene expression analysis by qPCR. 2D/3D indicates culture under 2D or 3D conditions. First “N” or “H” denotes culture under normoxic (N) or hypoxic (H) conditions during the initial 2D/3D culture period. Second “N” or “H” denotes culture under normoxic (N) or hypoxic (H) conditions during the licensing periods. Two-way ANOVA, Tukey post-hoc test. n.s.: statistically non-significant comparisons between 3D groups indicated. Horizontal bars: group median. N=2 MSC(AT) donors, n=3 technical replicates.

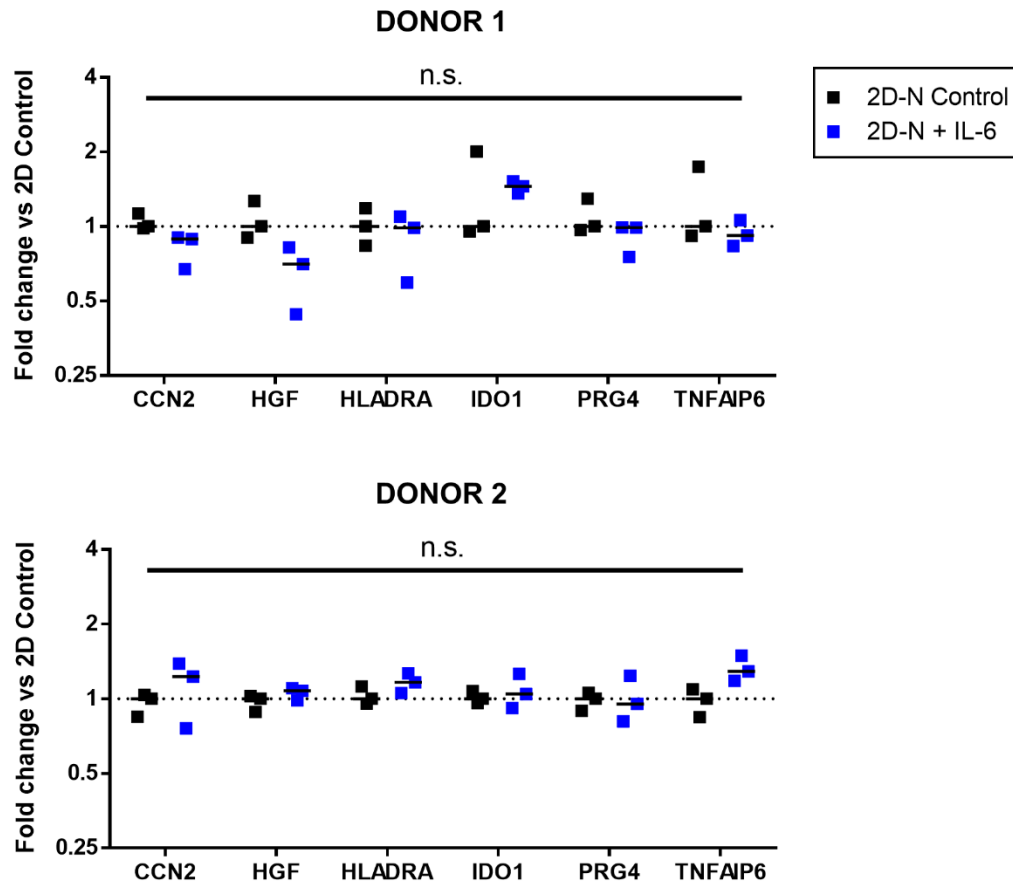

**Supplementary Figure 4. Gene expression analysis of licensed MSC(AT) demonstrated no effect of IL-6 treatment on MSC(AT) cultured under 2D-N conditions.** Two MSC(AT) donors cultured under 2D-N conditions with addition of IL-6 (at same concentration and duration as used for 3D-N culture) showed no significant changes in a panel of genes that were differentially expressed by MSC(AT) cultured under 3D-N conditions. Two-way ANOVA, Tukey post-hoc test. n.s.: statistically non-significant. 2D-N Control: 2D Normoxic culture without IL-6 treatment. Horizontal bars: group median. N=2 MSC(AT) donors, n=3 technical replicates.

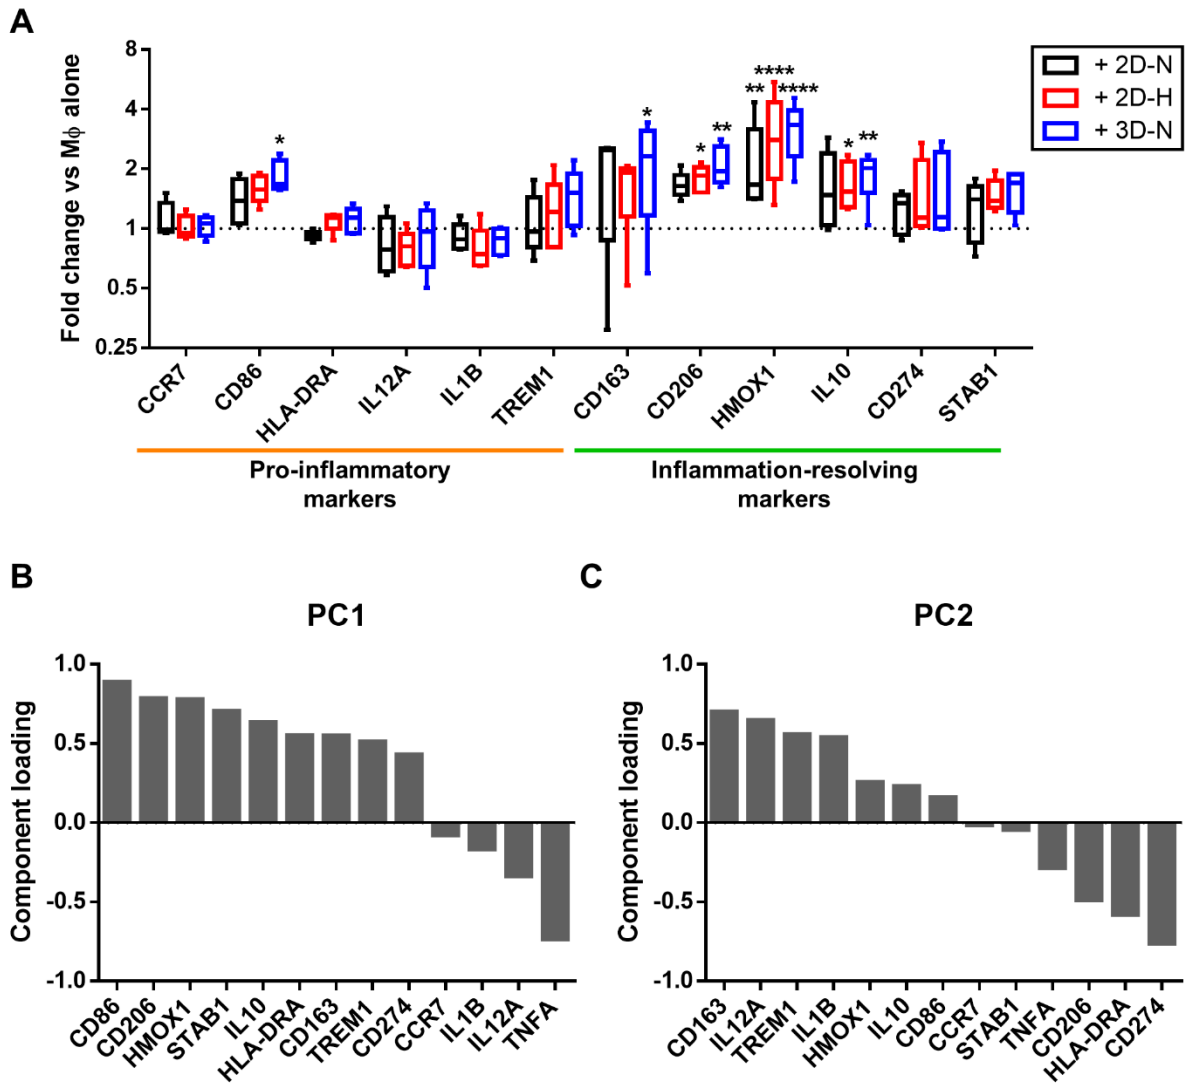

**Supplementary Figure 5. MSC(AT)-mediated M $\Phi$  polarization.** A) Box-and-whisker plots display changes in gene expression relative to M $\Phi$  cultured alone. Two-way ANOVA, Tukey post-hoc test. \* $p < 0.05$ , \*\* $p < 0.01$ , \*\*\*\* $p < 0.0001$  vs M $\Phi$  cultured alone. 3D-N: 3D Normoxic culture, 2D-N: 2D Normoxic culture, 2D-H: 2D Hypoxic culture.  $N = 5$  MSC(AT) donors,  $n = 3$  technical replicates. B and C) Factor loading plot shows the relative contribution of each factor to principal component 1 (PC1) (B) and PC2 (C) corresponding to the PC analysis in Figure 4C. Factors are listed in order of decreasing loadings. Loadings close to  $\pm 1$  have a greater relative contribution to the respective PC.

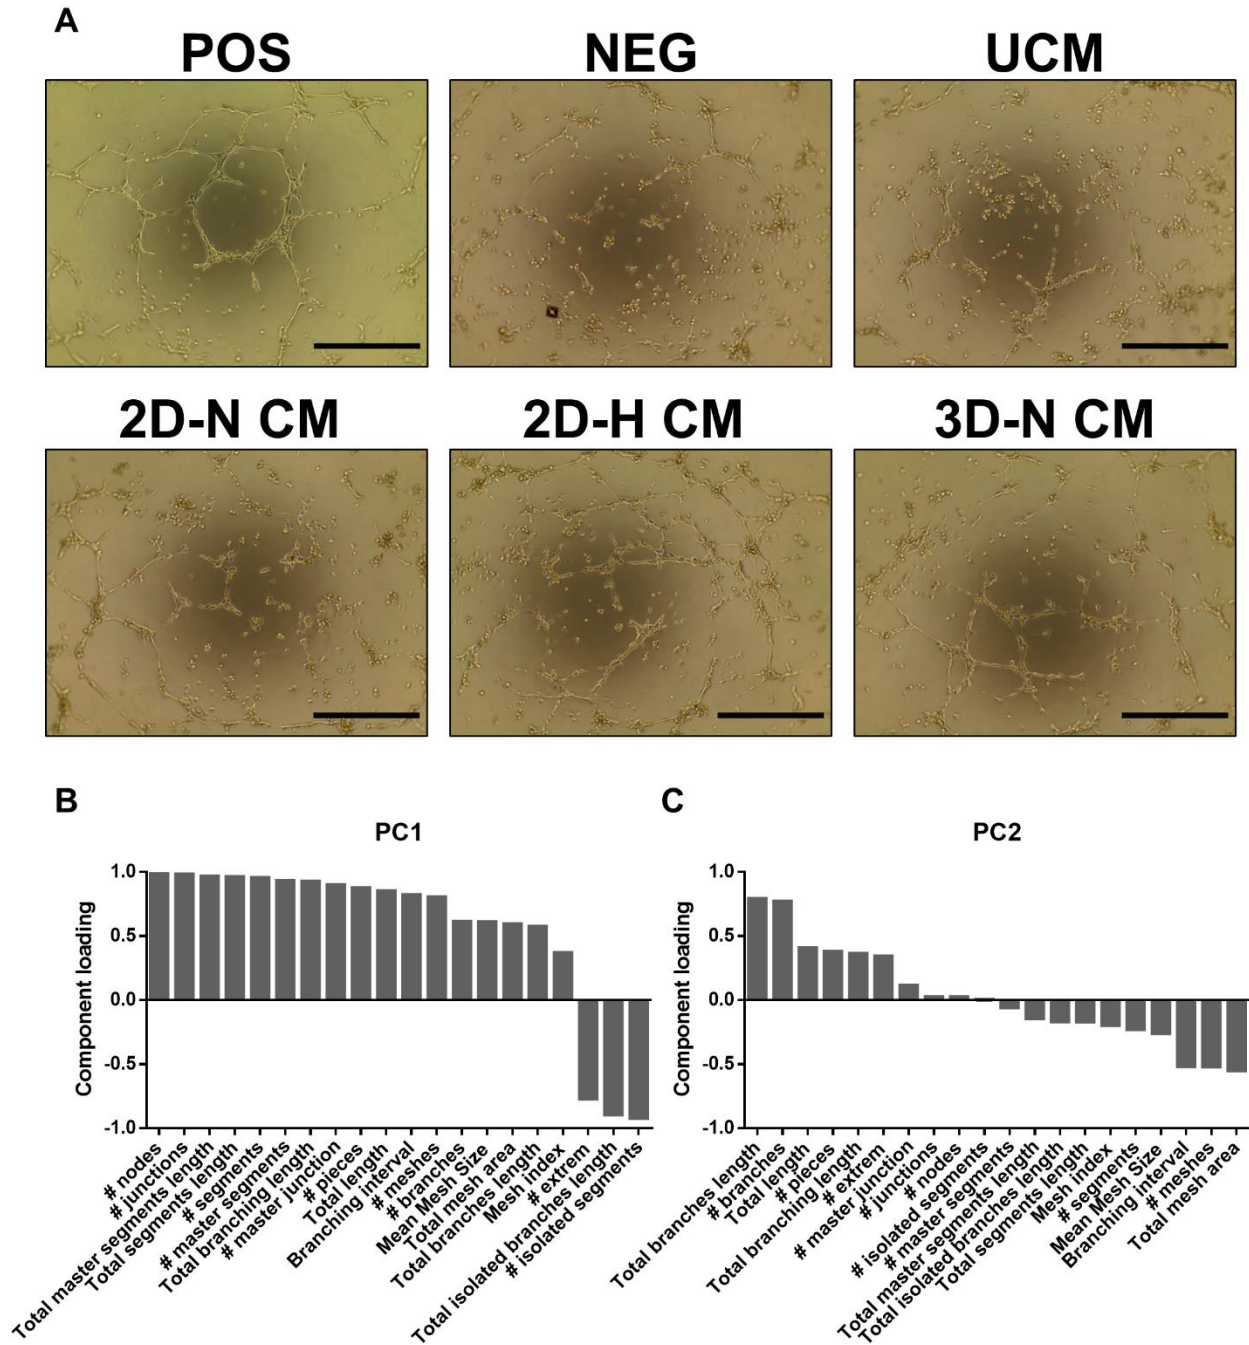

**Supplementary Figure 6. HUVEC tube formation analysis.** A) Phase-contrast images of HUVEC tube formation assay. Scale: 500  $\mu\text{m}$ . POS: positive control, NEG: negative control, UCM: unconditioned medium, 3D-N: 3D Normoxic culture, 2D-N: 2D Normoxic culture, 2D-H: 2D Hypoxic culture, CM: conditioned medium. B and C) Factor loading plot shows the relative contribution of each factor to principal component 1 (PC1) (B) and PC2 (C) corresponding to the PC analysis in Figure 5B. Factors are listed in order of decreasing loadings. Loadings close to  $\pm 1$  have a greater relative contribution to the respective PC.

**A**

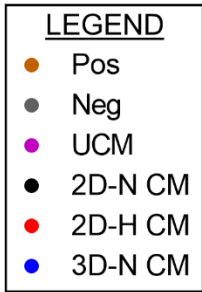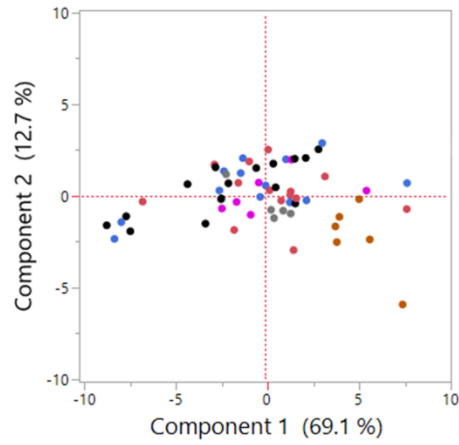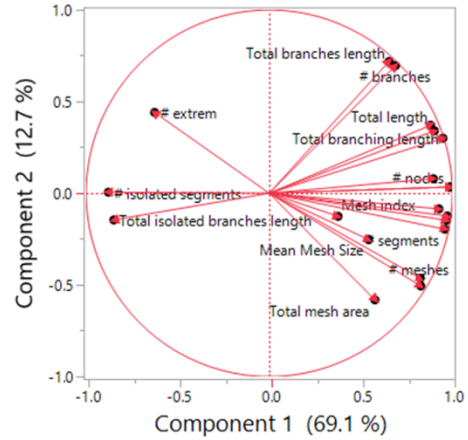

**B**

| Donor  | Media            | PC1 Score          | Mean PC1 Score $\pm$ SD |
|--------|------------------|--------------------|-------------------------|
|        | Positive Control | 7.504              | 5.086 $\pm$ 2.095       |
|        |                  | 3.918              |                         |
|        |                  | 3.836              |                         |
|        | Negative Control | 0.331              | -0.363 $\pm$ 1.802      |
|        |                  | -2.408             |                         |
|        |                  | 0.990              |                         |
|        | UCM Control      | -1.552             | -1.562 $\pm$ 0.785      |
|        |                  | -0.782             |                         |
|        |                  | -2.351             |                         |
| D2     | 2D-N             | -3.247             | -3.284 $\pm$ 0.922      |
|        |                  | -4.224             |                         |
|        |                  | -2.382             |                         |
|        | 2D-H             | 1.558              | 1.441 $\pm$ 0.102       |
|        |                  | 1.367              |                         |
|        |                  | 1.401              |                         |
| 3D-N   | 0.034            | -0.359 $\pm$ 1.962 |                         |
|        | -2.487           |                    |                         |
|        | 1.377            |                    |                         |
| D4     | 2D-N             | -7.571             | -7.850 $\pm$ 0.688      |
|        |                  | -8.633             |                         |
|        |                  | -7.346             |                         |
|        | 2D-H             | -6.674             | -4.065 $\pm$ 3.691      |
|        |                  | -1.455             |                         |
|        | 3D-N             | -7.837             | -8.024 $\pm$ 0.265      |
| -8.212 |                  |                    |                         |

**C**

| Donor       | Media            | PC1 Score          | Mean PC1 Score $\pm$ SD |
|-------------|------------------|--------------------|-------------------------|
|             | Positive Control | 5.132              | 4.967 $\pm$ 0.840       |
|             |                  | 4.056              |                         |
|             |                  | 5.712              |                         |
|             | Negative Control | -2.122             | -0.0759 $\pm$ 1.829     |
|             |                  | 1.401              |                         |
|             |                  | 0.493              |                         |
| UCM Control | 5.535            | 2.209 $\pm$ 3.014  |                         |
|             | -0.343           |                    |                         |
|             | 1.436            |                    |                         |
| D1          | 2D-N             | -1.995             | 1.047 $\pm$ 2.657       |
|             |                  | 2.915              |                         |
|             |                  | 2.221              |                         |
|             | 2D-H             | -0.863             | -0.555 $\pm$ 1.311      |
|             |                  | 0.883              |                         |
|             |                  | -1.685             |                         |
| 3D-N        | 7.747            | 4.002 $\pm$ 3.390  |                         |
|             | 1.143            |                    |                         |
|             | 3.116            |                    |                         |
| D3          | 2D-N             | -2.701             | -0.520 $\pm$ 2.162      |
|             |                  | 1.622              |                         |
|             |                  | -0.480             |                         |
|             | 2D-H             | 0.169              | 0.228 $\pm$ 3.014       |
|             |                  | 3.270              |                         |
|             |                  | -2.756             |                         |
| 3D-N        | 2.258            | 0.223 $\pm$ 1.841  |                         |
|             | -1.326           |                    |                         |
|             | -0.262           |                    |                         |
| D5          | 2D-N             | 1.652              | 0.894 $\pm$ 0.659       |
|             |                  | 0.581              |                         |
|             |                  | 0.449              |                         |
|             | 2D-H             | 7.728              | 3.225 $\pm$ 3.967       |
|             |                  | 1.703              |                         |
|             |                  | 0.244              |                         |
| 3D-N        | -1.207           | -0.695 $\pm$ 1.853 |                         |
|             | -2.239           |                    |                         |
|             | 1.360            |                    |                         |

*Legend on following page*

**Supplementary Figure 7. Principal component analysis of HUVEC tube formation image analysis read-outs showed differential effects of experimental batch, MSC(AT) donor heterogeneity, and variations in CPP conditions.** A) Principal component (PC) analysis of fold-change values (relative to negative control) of twenty HUVEC tube formation image analysis read-outs, including all biological and technical replicates (left) with corresponding loading plot of eigenvectors for each measurement (right). B and C) PC1 scores corresponding to technical replicates for each culture condition and donor within experimental batch 1 (B) and batch 2 (C). N=5 MSC(AT) donors, n=2-3 technical replicates/condition. Horizontal bars: group mean, error bars: standard deviation. Pos: positive control, Neg: negative control, UCM: unconditioned medium, 3D-N: 3D Normoxic culture, 2D-N: 2D Normoxic culture, 2D-H: 2D Hypoxic culture, CM: conditioned medium. Note, this data includes biological and technical replicates while Figure 5 is based on median values of biological replicates only.



## 2 Supplementary Tables:

**Supplementary Table 1. Forward and reverse primer sequences for qPCR.**

| Gene           | Forward                   | Reverse                 |
|----------------|---------------------------|-------------------------|
| <i>ACTB</i>    | AGAGGGAAATCGTGCGTGAC      | AGGAGCCAGGGCAGTAATC     |
| <i>B2M</i>     | CTCCGTGGCCTTAGCTGTG       | TTTGGAGTACGCTGGATAGCCT  |
| <i>CCN2</i>    | TGTGGCTTTAGGAGCAGTGG      | GCTACAGGCAGGTCAGTGAG    |
| <i>CCR7</i>    | TTTTACCGCCCAGAGAGCG       | AATGACAAGGAGAGCCACC     |
| <i>CD163</i>   | TGGACCTAATGAATTCCTCAGAAAA | ACACAGAAATTAGTTCAGCAGCA |
| <i>CD206</i>   | CTACAAGGGATCGGGTTTATGGA   | TTGGCATTGCCTAGTAGCGTA   |
| <i>CD274</i>   | TCAATGCCCCATACAACAA       | TGCTTGTCCAGATGACTTCG    |
| <i>CD86</i>    | CTGCTCATCTATACACGGTACC    | GGAAACGTCGTACAGTTCTGTG  |
| <i>CD86</i>    | CCATCAGCTTGTCTGTTTCATTCC  | GCTGTAATCCAAGGAATGTGGTC |
| <i>HGF</i>     | TGGTTTTAATGAAGCTTGCCAG    | GAGATGTGCCACTCGTAATAGG  |
| <i>HLADRA</i>  | AAGCACTGGGAGTTTGATGC      | ATTGCTTTTGCGCAATCCCT    |
| <i>HMOX1</i>   | AAGACTGCGTTCCTGCTCAAC     | AAAGCCCTACAGCAACTGTCTG  |
| <i>IDO1</i>    | GCCCTTCAAGTGTTTCACCAA     | CCAGCCAGACAAATATATGCGA  |
| <i>IL10</i>    | CGAGATGCCTTCAGCAGAGT      | CGCCTTGATGTCTGGGTCTT    |
| <i>IL12A</i>   | CCTCCACTGTGCTGGTTTTAT     | TCAGCAACATGCTCCAGAAG    |
| <i>IL1B</i>    | GTACCTGTCCTGCGTGTTGA      | GGGAACCTGGGCAGACTCAA    |
| <i>IL1RA</i>   | AGCATGAGGCTCAATGGGTA      | AAATCCAGCAAGATGCAAGC    |
| <i>PRG4</i>    | AGGCCCATGTGTTTCATGC       | GCGCAAAGTAGTCAGTCCATCT  |
| <i>PTGS2</i>   | ATAAGCGAGGGCCAGCTTTC      | CGCAGTTTACGCTGTCTAGC    |
| <i>RPL13A</i>  | TGCGACAAAACCTCCTCCTT      | TGTTGATGCCTTCACAGCGTA   |
| <i>STAB1</i>   | GAACCATGTGCCACTGGAAGGC    | AGCGGAATCTCCTGGTGCAGTT  |
| <i>TBP</i>     | AGCGCAAGGGTTTCTGGTTT      | AATAGGCTGTGGGGTCAGTC    |
| <i>TNFAIP6</i> | AGCACGGTCTGGCAAATACA      | ATCCATCCAGCAGCACAGAC    |
| <i>TREMI</i>   | AGTTGCAGCTCGGAGTTCTGAGACA | GAACCATGTGCCACTGGAAGGC  |
| <i>VEGFA</i>   | CTACCTCCACCATGCCAAGT      | AGCTGCGCTGATAGACATCC    |

**Supplementary Table 2. Gene expression measured for MSC(AT) under licensed conditions.** All data values represent mRNA counts.  
 2D-N: 2D normoxic, 2D-H: 2D hypoxic, 3D-N: 3D normoxic, D: donor.

|                 | 2D-N     |          |          |          | 2D-H     |          |          |          |          | 3D-N     |          |          |          |          |
|-----------------|----------|----------|----------|----------|----------|----------|----------|----------|----------|----------|----------|----------|----------|----------|
|                 | D1       | D2       | D3       | D4       | D1       | D2       | D3       | D4       | D5       | D1       | D2       | D3       | D4       | D5       |
| <i>ACTA2</i>    | 66.71    | 73.01    | 159.42   | 126.59   | 54.88    | 59.98    | 201.10   | 104.78   | 182.93   | 64.57    | 61.05    | 73.53    | 129.03   | 130.04   |
| <i>ANG</i>      | 1.00     | 29.78    | 31.29    | 49.80    | 27.05    | 27.93    | 46.31    | 45.26    | 58.40    | 1.00     | 32.76    | 33.61    | 61.01    | 60.46    |
| <i>ANGPT1</i>   | 69.55    | 68.21    | 215.51   | 60.18    | 77.29    | 50.94    | 237.48   | 105.62   | 79.87    | 42.27    | 61.05    | 204.84   | 94.67    | 104.95   |
| <i>CCN2</i>     | 370.44   | 634.06   | 366.07   | 414.00   | 175.45   | 315.50   | 416.75   | 274.10   | 470.63   | 63.40    | 95.29    | 96.64    | 214.58   | 295.45   |
| <i>CD274</i>    | 55.35    | 60.52    | 71.44    | 179.51   | 81.93    | 117.49   | 160.09   | 202.01   | 196.67   | 136.19   | 92.32    | 102.95   | 155.68   | 242.98   |
| <i>CXCL8</i>    | 33604.11 | 31658.65 | 31881.42 | 51553.32 | 31885.05 | 25841.33 | 44656.26 | 49225.02 | 46010.56 | 26878.33 | 31301.07 | 27422.28 | 37158.81 | 25008.42 |
| <i>EDIL3</i>    | 33.35    | 268.03   | 240.90   | 44.62    | 38.64    | 188.15   | 302.97   | 64.54    | 287.71   | 149.10   | 564.32   | 571.45   | 122.02   | 400.40   |
| <i>EDN1</i>     | 1.00     | 28.82    | 34.24    | 63.29    | 35.55    | 1.00     | 63.51    | 59.51    | 65.27    | 1.00     | 1.00     | 1.00     | 1.00     | 45.63    |
| <i>F3</i>       | 132.70   | 269.95   | 1253.48  | 482.49   | 192.45   | 188.97   | 1602.85  | 781.22   | 1752.86  | 194.89   | 737.04   | 1655.53  | 1138.82  | 2779.98  |
| <i>HGF</i>      | 139.80   | 373.71   | 774.05   | 1322.94  | 191.68   | 569.38   | 1041.89  | 1590.93  | 380.46   | 801.87   | 1926.72  | 2294.21  | 4151.35  | 1639.24  |
| <i>HLA-DRA</i>  | 58.90    | 91.27    | 303.48   | 227.24   | 40.19    | 52.58    | 279.82   | 93.04    | 190.66   | 241.85   | 608.99   | 2322.57  | 1131.80  | 2098.96  |
| <i>ICAM1</i>    | 1724.45  | 2976.22  | 3400.87  | 5953.77  | 2317.14  | 3178.82  | 4966.00  | 6604.30  | 7610.89  | 3950.62  | 7120.24  | 6305.92  | 8007.48  | 10232.43 |
| <i>IDO1</i>     | 6089.52  | 6800.74  | 4326.67  | 12426.34 | 7418.26  | 6853.89  | 5440.30  | 13258.88 | 9205.72  | 12371.97 | 13193.74 | 9266.12  | 17824.17 | 14762.30 |
| <i>NFKBIA</i>   | 1167.38  | 1195.10  | 1092.29  | 2003.61  | 1294.60  | 1262.00  | 1598.22  | 2450.10  | 2114.42  | 2472.52  | 3071.74  | 2177.61  | 3567.22  | 3125.62  |
| <i>NOS2</i>     | 1.00     | 1.00     | 1.00     | 1.00     | 1.00     | 1.00     | 1.00     | 1.00     | 1.00     | 31.70    | 52.11    | 183.83   | 52.59    | 71.87    |
| <i>PDCD1LG2</i> | 267.54   | 244.98   | 190.12   | 329.96   | 258.15   | 227.59   | 288.42   | 231.35   | 322.06   | 79.83    | 47.65    | 59.88    | 63.81    | 95.82    |
| <i>PDGFA</i>    | 1.00     | 1.00     | 31.88    | 32.17    | 1.00     | 1.00     | 37.71    | 1.00     | 33.49    | 1.00     | 28.29    | 37.82    | 32.26    | 38.79    |
| <i>PRG4</i>     | 1.00     | 1.00     | 1.00     | 1.00     | 1.00     | 1.00     | 1.00     | 1.00     | 1.00     | 95.10    | 41.69    | 119.75   | 55.40    | 41.07    |
| <i>PTGES</i>    | 965.13   | 890.56   | 1451.28  | 1562.63  | 908.93   | 955.53   | 2055.99  | 1638.71  | 1709.06  | 2157.87  | 2499.98  | 3088.35  | 3586.85  | 3151.86  |
| <i>PTGS2</i>    | 709.65   | 865.58   | 1409.35  | 1610.36  | 1385.80  | 1561.06  | 3568.88  | 3367.11  | 693.93   | 2112.09  | 3566.08  | 2674.47  | 4453.59  | 862.40   |
| <i>SMAD7</i>    | 268.25   | 275.72   | 217.87   | 504.28   | 265.10   | 194.72   | 267.25   | 398.99   | 320.34   | 363.95   | 454.14   | 298.33   | 502.79   | 436.90   |
| <i>TGFB1</i>    | 97.93    | 96.07    | 78.53    | 169.13   | 119.03   | 270.31   | 219.62   | 267.39   | 188.94   | 206.63   | 227.81   | 118.70   | 297.33   | 246.40   |
| <i>THBS1</i>    | 2619.32  | 7517.42  | 5645.69  | 9328.05  | 2541.28  | 6022.41  | 6726.29  | 4569.95  | 6013.48  | 860.57   | 1745.07  | 512.62   | 1135.31  | 2015.69  |
| <i>THBS2</i>    | 943.13   | 333.36   | 1221.60  | 1577.16  | 1084.37  | 296.60   | 1349.49  | 1344.50  | 1368.96  | 1680.04  | 296.30   | 917.05   | 1403.19  | 1511.48  |
| <i>TIMP1</i>    | 3559.61  | 2387.32  | 4687.42  | 3605.67  | 3938.68  | 2026.09  | 6256.61  | 4231.31  | 5595.23  | 7416.37  | 7633.94  | 10374.35 | 10542.47 | 12197.92 |
| <i>TLR2</i>     | 72.38    | 410.22   | 161.78   | 1039.68  | 129.85   | 736.99   | 419.40   | 1317.67  | 1727.95  | 516.57   | 1682.53  | 774.19   | 1865.30  | 2882.65  |
| <i>TLR3</i>     | 51.80    | 83.58    | 73.21    | 63.29    | 57.97    | 59.98    | 61.52    | 35.21    | 37.79    | 104.49   | 86.36    | 60.93    | 59.61    | 62.74    |

|                |        |        |        |        |        |        |        |         |        |         |         |        |         |         |
|----------------|--------|--------|--------|--------|--------|--------|--------|---------|--------|---------|---------|--------|---------|---------|
| <i>TLR4</i>    | 1.00   | 30.74  | 30.11  | 1.00   | 1.00   | 1.00   | 38.37  | 1.00    | 30.06  | 30.52   | 52.11   | 58.83  | 35.06   | 76.43   |
| <i>TNFAIP6</i> | 390.31 | 525.50 | 284.00 | 892.34 | 487.70 | 707.41 | 608.59 | 1015.92 | 692.21 | 1266.78 | 2147.09 | 894.99 | 2300.07 | 1692.86 |
| <i>TSG101</i>  | 297.34 | 338.16 | 311.75 | 437.87 | 272.06 | 285.10 | 421.39 | 424.98  | 420.82 | 407.39  | 400.53  | 352.95 | 488.06  | 473.41  |
| <i>TWIST1</i>  | 1.00   | 1.00   | 1.00   | 28.02  | 1.00   | 40.26  | 59.54  | 1.00    | 27.48  | 1.00    | 28.29   | 54.62  | 63.81   | 54.76   |
| <i>VEGFA</i>   | 300.89 | 215.20 | 210.78 | 373.54 | 319.98 | 234.16 | 389.63 | 517.18  | 453.46 | 231.28  | 226.32  | 130.26 | 258.76  | 198.49  |

**Supplementary Table 3: Gene expression measured for MSC(AT) under unlicensed conditions.** All data values represent mRNA counts. 2D-N: 2D normoxic, 2D-H: 2D hypoxic, 3D-N: 3D normoxic, D: donor.

|                 | 2D-N    |          |          |          |          | 2D-H    |         |          |          |          | 3D-N     |          |          |          |          |
|-----------------|---------|----------|----------|----------|----------|---------|---------|----------|----------|----------|----------|----------|----------|----------|----------|
|                 | D1      | D2       | D3       | D4       | D5       | D1      | D2      | D3       | D4       | D5       | D1       | D2       | D3       | D4       | D5       |
| <i>ACTA2</i>    | 103.34  | 280.09   | 2470.80  | 292.80   | 528.41   | 78.54   | 269.85  | 3197.28  | 345.23   | 905.41   | 169.22   | 146.93   | 512.59   | 456.80   | 395.51   |
| <i>ANG</i>      | 27.23   | 33.98    | 68.28    | 60.31    | 88.99    | 32.04   | 25.10   | 58.03    | 65.62    | 70.28    | 28.49    | 44.36    | 55.49    | 71.43    | 65.28    |
| <i>ANGPT1</i>   | 37.01   | 33.98    | 204.19   | 92.05    | 114.98   | 60.95   | 27.79   | 170.28   | 94.15    | 118.52   | 45.76    | 41.58    | 327.12   | 96.34    | 93.44    |
| <i>CCN2</i>     | 3211.24 | 6617.70  | 11393.39 | 5027.57  | 3347.68  | 970.09  | 3834.39 | 7376.29  | 3600.68  | 3836.61  | 426.51   | 586.33   | 289.15   | 452.65   | 334.07   |
| <i>CXCL8</i>    | 488.08  | 314.89   | 230.04   | 250.74   | 458.33   | 98.01   | 158.68  | 76.10    | 233.96   | 250.81   | 609.55   | 298.01   | 299.38   | 434.37   | 350.71   |
| <i>EDIL3</i>    | 32.12   | 256.06   | 763.71   | 66.65    | 378.00   | 31.41   | 242.96  | 725.83   | 85.59    | 475.44   | 37.13    | 212.08   | 887.90   | 58.14    | 355.83   |
| <i>EDN1</i>     | 1.00    | 42.26    | 53.70    | 1.00     | 18.11    | 1.00    | 53.79   | 54.22    | 1.00     | 1.00     | 1.00     | 1.00     | 1.00     | 1.00     | 1.00     |
| <i>F3</i>       | 300.95  | 237.83   | 1079.94  | 556.24   | 1270.24  | 807.36  | 346.95  | 1278.53  | 1015.72  | 1802.54  | 290.10   | 238.41   | 940.48   | 826.39   | 2017.25  |
| <i>HGF</i>      | 43.29   | 91.15    | 653.66   | 168.22   | 273.26   | 37.07   | 83.38   | 554.60   | 92.25    | 165.37   | 133.82   | 224.55   | 1380.05  | 320.59   | 400.63   |
| <i>ICAM1</i>    | 29.33   | 45.58    | 45.08    | 46.02    | 103.95   | 15.71   | 1.00    | 26.64    | 74.18    | 110.25   | 118.28   | 180.19   | 242.42   | 245.01   | 181.76   |
| <i>NFKBIA</i>   | 191.32  | 223.74   | 325.51   | 280.10   | 384.30   | 559.19  | 259.99  | 315.83   | 548.76   | 569.15   | 305.64   | 313.26   | 479.00   | 498.33   | 559.35   |
| <i>PDCD1LG2</i> | 83.09   | 72.09    | 85.52    | 115.06   | 140.18   | 96.13   | 86.07   | 109.40   | 127.44   | 162.61   | 58.71    | 37.43    | 33.59    | 47.34    | 37.12    |
| <i>PDGFA</i>    | 1.00    | 48.06    | 127.95   | 61.89    | 66.94    | 1.00    | 52.00   | 103.69   | 38.04    | 74.42    | 1.00     | 59.60    | 113.91   | 67.27    | 85.76    |
| <i>PRG4</i>     | 1.00    | 1.00     | 60.33    | 1.00     | 1.00     | 1.00    | 1.00    | 42.81    | 1.00     | 1.00     | 102.74   | 29.11    | 497.98   | 60.63    | 78.08    |
| <i>PTGS2</i>    | 62.14   | 35.63    | 49.06    | 67.45    | 92.14    | 324.83  | 94.13   | 43.76    | 337.62   | 226.01   | 98.43    | 67.92    | 78.86    | 52.32    | 40.96    |
| <i>SMAD7</i>    | 111.02  | 140.04   | 322.85   | 207.10   | 244.91   | 94.87   | 90.55   | 253.04   | 204.48   | 224.63   | 249.52   | 246.73   | 448.33   | 427.73   | 450.55   |
| <i>SOX9</i>     | 50.97   | 29.83    | 1.00     | 53.16    | 1.00     | 31.41   | 33.17   | 1.00     | 38.04    | 1.00     | 30.22    | 36.04    | 1.00     | 61.46    | 29.44    |
| <i>TGFB1</i>    | 132.67  | 200.54   | 423.62   | 322.16   | 232.31   | 140.11  | 487.70  | 420.47   | 352.84   | 227.39   | 212.39   | 559.99   | 480.46   | 581.38   | 343.03   |
| <i>THBS1</i>    | 4010.04 | 13388.71 | 10911.43 | 14430.46 | 7249.76  | 2613.10 | 9433.12 | 12694.95 | 15145.48 | 12391.80 | 1009.29  | 2080.55  | 575.38   | 6109.48  | 2771.16  |
| <i>THBS2</i>    | 553.01  | 674.53   | 4893.20  | 868.08   | 2294.00  | 404.62  | 478.74  | 4279.85  | 780.81   | 2253.18  | 945.40   | 1388.88  | 6546.82  | 1918.56  | 3143.63  |
| <i>TIMP1</i>    | 4588.19 | 3941.12  | 13179.36 | 7460.42  | 10995.12 | 4283.74 | 3655.99 | 11755.08 | 7918.45  | 11516.71 | 10140.39 | 11963.53 | 39473.71 | 23333.31 | 30155.04 |
| <i>TLR2</i>     | 1.00    | 1.00     | 1.00     | 1.00     | 73.24    | 1.00    | 1.00    | 1.00     | 1.00     | 67.53    | 1.00     | 44.36    | 26.29    | 46.51    | 206.08   |
| <i>TLR3</i>     | 1.00    | 1.00     | 45.08    | 1.00     | 25.20    | 1.00    | 1.00    | 34.25    | 1.00     | 26.18    | 1.00     | 26.34    | 167.94   | 1.00     | 1.00     |
| <i>TLR4</i>     | 1.00    | 36.46    | 71.60    | 30.15    | 55.91    | 28.90   | 42.14   | 73.25    | 53.26    | 103.36   | 25.90    | 27.72    | 112.45   | 32.39    | 88.32    |
| <i>TNFAIP6</i>  | 1.00    | 1.00     | 1.00     | 28.57    | 1.00     | 1.00    | 1.00    | 29.49    | 35.19    | 1.00     | 32.81    | 1.00     | 45.27    | 45.68    | 40.96    |
| <i>TSG101</i>   | 238.80  | 299.98   | 599.97   | 532.43   | 504.79   | 209.22  | 284.20  | 560.31   | 454.60   | 463.04   | 255.56   | 339.60   | 579.77   | 533.21   | 463.35   |

|               |        |        |        |        |        |        |        |        |        |        |        |        |        |        |        |
|---------------|--------|--------|--------|--------|--------|--------|--------|--------|--------|--------|--------|--------|--------|--------|--------|
| <i>TWIST1</i> | 1.00   | 1.00   | 55.69  | 38.88  | 40.95  | 33.30  | 104.89 | 91.32  | 55.16  | 38.59  | 1.00   | 31.88  | 58.41  | 44.85  | 48.64  |
| <i>VASH1</i>  | 1.00   | 1.00   | 29.83  | 26.19  | 1.00   | 1.00   | 1.00   | 30.44  | 31.38  | 37.21  | 1.00   | 1.00   | 75.94  | 61.46  | 47.36  |
| <i>VEGFA</i>  | 500.64 | 367.93 | 894.31 | 710.97 | 678.83 | 461.80 | 214.27 | 761.98 | 565.88 | 712.47 | 683.80 | 368.71 | 756.47 | 498.33 | 481.27 |

**Supplementary Table 4: Differential gene expression analysis relative to 2D-N measured under licensed conditions.** Multivariate linear regression, Benjamini-Yekutieli (BY) False Discovery Rate-corrected p values. Bolded font indicates p<0.05 vs 2D-N. 3D-N: 3D Normoxic culture, 2D-N: 2D Normoxic culture, 2D-H: 2D Hypoxic culture. N=5 MSC(AT) donors, n=1 technical replicate due to high sensitivity of Nanostring measurements.

|                 | 3D-N vs 2D-N                 |                                    |                 | 2D-H vs 2D-N                 |                                    |               |
|-----------------|------------------------------|------------------------------------|-----------------|------------------------------|------------------------------------|---------------|
|                 | Log <sub>2</sub> Fold Change | Standard Error (Log <sub>2</sub> ) | BY p value      | Log <sub>2</sub> Fold Change | Standard Error (Log <sub>2</sub> ) | BY p value    |
| <i>ACTA2</i>    | 0.0416                       | 0.187                              | 1               | -0.16                        | 0.189                              | 1             |
| <i>ANG</i>      | <b>0.595</b>                 | <b>0.178</b>                       | <b>0.0273</b>   | 0.0481                       | 0.178                              | 1             |
| <i>ANGPT1</i>   | 0.422                        | 0.201                              | 0.28            | 0.0153                       | 0.201                              | 1             |
| <i>CCN2</i>     | <b>-1.61</b>                 | <b>0.202</b>                       | <b>2.09E-05</b> | <b>-0.851</b>                | <b>0.199</b>                       | <b>0.0291</b> |
| <i>CD274</i>    | <b>0.965</b>                 | <b>0.25</b>                        | <b>0.0104</b>   | 0.447                        | 0.252                              | 1             |
| <i>CXCL8</i>    | 0.141                        | 0.216                              | 1               | -0.0014                      | 0.216                              | 1             |
| <i>EDIL3</i>    | <b>1.9</b>                   | <b>0.237</b>                       | <b>2.08E-05</b> | 0.165                        | 0.244                              | 1             |
| <i>EDN1</i>     | <b>-1.05</b>                 | <b>0.259</b>                       | <b>0.00751</b>  | 0.0257                       | 0.23                               | 1             |
| <i>F3</i>       | <b>1.37</b>                  | <b>0.24</b>                        | <b>0.000407</b> | 0.255                        | 0.242                              | 1             |
| <i>HGF</i>      | <b>2.47</b>                  | <b>0.214</b>                       | <b>6.09E-07</b> | 0.208                        | 0.216                              | 1             |
| <i>HLA-DRA</i>  | <b>2.99</b>                  | <b>0.192</b>                       | <b>4.36E-08</b> | <b>-0.879</b>                | <b>0.207</b>                       | <b>0.0291</b> |
| <i>ICAM1</i>    | <b>1.37</b>                  | <b>0.228</b>                       | <b>0.000249</b> | 0.209                        | 0.228                              | 1             |
| <i>IDO1</i>     | <b>1.34</b>                  | <b>0.211</b>                       | <b>0.000147</b> | 0.0651                       | 0.211                              | 1             |
| <i>NOS2</i>     | <b>6.07</b>                  | <b>0.454</b>                       | <b>1.68E-07</b> | 1.52                         | 0.454                              | 0.14          |
| <i>NFKBIA</i>   | <b>1.51</b>                  | <b>0.199</b>                       | <b>3.08E-05</b> | 0.203                        | 0.199                              | 1             |
| <i>PDGFA</i>    | 1.34                         | 0.625                              | 0.27            | -0.161                       | 0.625                              | 1             |
| <i>PDCD1LG2</i> | <b>-1.65</b>                 | <b>0.216</b>                       | <b>3.07E-05</b> | -0.213                       | 0.208                              | 1             |
| <i>PRG4</i>     | <b>3.56</b>                  | <b>0.316</b>                       | <b>6.09E-07</b> | -0.479                       | 0.419                              | 1             |
| <i>PTGES</i>    | <b>1.68</b>                  | <b>0.173</b>                       | <b>2.82E-06</b> | 0.0833                       | 0.174                              | 1             |
| <i>PTGS2</i>    | <b>1.93</b>                  | <b>0.215</b>                       | <b>6.33E-06</b> | <b>0.977</b>                 | <b>0.215</b>                       | <b>0.0291</b> |
| <i>SMAD7</i>    | <b>0.819</b>                 | <b>0.232</b>                       | <b>0.0191</b>   | -0.256                       | 0.234                              | 1             |
| <i>TGFB1</i>    | <b>1.42</b>                  | <b>0.189</b>                       | <b>3.12E-05</b> | <b>0.823</b>                 | <b>0.191</b>                       | <b>0.0291</b> |
| <i>THBS1</i>    | <b>-2.18</b>                 | <b>0.301</b>                       | <b>4.10E-05</b> | -0.582                       | 0.301                              | 1             |
| <i>THBS2</i>    | 0.421                        | 0.212                              | 0.336           | -0.193                       | 0.213                              | 1             |
| <i>TIMP1</i>    | <b>1.82</b>                  | <b>0.178</b>                       | <b>1.71E-06</b> | 0.0917                       | 0.178                              | 1             |
| <i>TLR2</i>     | <b>2.32</b>                  | <b>0.311</b>                       | <b>3.23E-05</b> | 0.663                        | 0.312                              | 0.839         |
| <i>TLR3</i>     | <b>0.728</b>                 | <b>0.162</b>                       | <b>0.00348</b>  | -0.502                       | 0.181                              | 0.309         |
| <i>TLR4</i>     | <b>1.59</b>                  | <b>0.249</b>                       | <b>0.000142</b> | -0.0289                      | 0.249                              | 1             |
| <i>TSG101</i>   | <b>0.697</b>                 | <b>0.164</b>                       | <b>0.00533</b>  | -0.0988                      | 0.166                              | 1             |
| <i>TNFAIP6</i>  | <b>2.14</b>                  | <b>0.189</b>                       | <b>6.09E-07</b> | 0.365                        | 0.191                              | 1             |
| <i>TWIST1</i>   | <b>1.98</b>                  | <b>0.28</b>                        | <b>4.86E-05</b> | 0.849                        | 0.299                              | 0.309         |
| <i>VEGFA</i>    | 0.0164                       | 0.22                               | 1               | 0.348                        | 0.219                              | 1             |

**Supplementary Table 5: Differential gene expression analysis relative to 2D-N measured under unlicensed conditions.** Multivariate linear regression, Benjamini-Yekutieli (BY) False Discovery Rate-corrected p values. Bolded font indicates  $p < 0.05$  vs 2D-N. 3D-N: 3D Normoxic culture, 2D-N: 2D Normoxic culture, 2D-H: 2D Hypoxic culture. N=5 MSC(AT) donors, n=1 technical replicate due to high sensitivity of Nanostring measurements.

|                 | 3D-N vs 2D-N                 |                                    |                 | 2D-H vs 2D-N                 |                                    |                |
|-----------------|------------------------------|------------------------------------|-----------------|------------------------------|------------------------------------|----------------|
|                 | Log <sub>2</sub> Fold Change | Standard Error (Log <sub>2</sub> ) | BY p value      | Log <sub>2</sub> Fold Change | Standard Error (Log <sub>2</sub> ) | BY p value     |
| <i>ACTA2</i>    | 0.174                        | 0.334                              | 1               | 0.726                        | 0.333                              | 0.625          |
| <i>ANG</i>      | <b>0.626</b>                 | <b>0.163</b>                       | <b>0.0115</b>   | 0.23                         | 0.17                               | 1              |
| <i>ANGPT1</i>   | <b>0.928</b>                 | <b>0.227</b>                       | <b>0.00794</b>  | 0.463                        | 0.231                              | 0.704          |
| <i>CCN2</i>     | <b>-3.07</b>                 | <b>0.296</b>                       | <b>1.76E-06</b> | -0.181                       | 0.295                              | 1              |
| <i>CXCL8</i>    | 0.918                        | 0.453                              | 0.266           | -0.859                       | 0.455                              | 0.736          |
| <i>EDIL3</i>    | <b>0.701</b>                 | <b>0.186</b>                       | <b>0.0124</b>   | 0.551                        | 0.187                              | 0.157          |
| <i>F3</i>       | <b>0.829</b>                 | <b>0.205</b>                       | <b>0.00798</b>  | <b>1.1</b>                   | <b>0.205</b>                       | <b>0.00596</b> |
| <i>HGF</i>      | <b>1.76</b>                  | <b>0.173</b>                       | <b>1.76E-06</b> | -0.0518                      | 0.181                              | 1              |
| <i>ICAM1</i>    | <b>2.79</b>                  | <b>0.459</b>                       | <b>0.000344</b> | 0.0797                       | 0.47                               | 1              |
| <i>NFKBIA</i>   | <b>1.29</b>                  | <b>0.22</b>                        | <b>0.000448</b> | <b>1.07</b>                  | <b>0.22</b>                        | <b>0.00876</b> |
| <i>PDGFA</i>    | 0.544                        | 0.259                              | 0.242           | -0.00801                     | 0.259                              | 1              |
| <i>PDCD1LG2</i> | -0.621                       | 0.325                              | 0.318           | 0.67                         | 0.317                              | 0.635          |
| <i>PRG4</i>     | <b>3.88</b>                  | <b>0.527</b>                       | <b>6.00E-05</b> | -0.854                       | 0.527                              | 0.952          |
| <i>PTGES</i>    | <b>3.67</b>                  | <b>0.64</b>                        | <b>0.000512</b> | 0.0319                       | 0.724                              | 1              |
| <i>PTGS2</i>    | 1                            | 0.474                              | 0.242           | <b>1.99</b>                  | <b>0.471</b>                       | <b>0.017</b>   |
| <i>SMAD7</i>    | <b>1.53</b>                  | <b>0.147</b>                       | <b>1.76E-06</b> | 0.122                        | 0.153                              | 1              |
| <i>SOX9</i>     | 0.536                        | 0.23                               | 0.169           | -0.143                       | 0.244                              | 1              |
| <i>TGFB1</i>    | <b>1.38</b>                  | <b>0.133</b>                       | <b>1.76E-06</b> | <b>0.642</b>                 | <b>0.135</b>                       | <b>0.00876</b> |
| <i>THBS1</i>    | <b>-1.7</b>                  | <b>0.301</b>                       | <b>0.00056</b>  | 0.398                        | 0.301                              | 1              |
| <i>THBS2</i>    | <b>1.4</b>                   | <b>0.187</b>                       | <b>5.94E-05</b> | 0.154                        | 0.188                              | 1              |
| <i>TIMP1</i>    | <b>2.11</b>                  | <b>0.167</b>                       | <b>5.63E-07</b> | 0.308                        | 0.167                              | 0.736          |
| <i>TLR2</i>     | <b>2.64</b>                  | <b>0.518</b>                       | <b>0.00133</b>  | 0.561                        | 0.546                              | 1              |
| <i>TLR3</i>     | <b>1.84</b>                  | <b>0.513</b>                       | <b>0.0172</b>   | 0.027                        | 0.54                               | 1              |
| <i>TLR4</i>     | <b>1.14</b>                  | <b>0.23</b>                        | <b>0.00158</b>  | <b>1.08</b>                  | <b>0.231</b>                       | <b>0.00876</b> |
| <i>TSG101</i>   | <b>0.655</b>                 | <b>0.129</b>                       | <b>0.00133</b>  | 0.222                        | 0.13                               | 0.869          |
| <i>TNFAIP6</i>  | <b>1.94</b>                  | <b>0.306</b>                       | <b>0.000245</b> | 0.612                        | 0.331                              | 0.736          |
| <i>TWIST1</i>   | <b>0.865</b>                 | <b>0.249</b>                       | <b>0.0205</b>   | <b>1.43</b>                  | <b>0.243</b>                       | <b>0.0046</b>  |
| <i>VASH1</i>    | <b>1.85</b>                  | <b>0.265</b>                       | <b>9.63E-05</b> | 0.868                        | 0.265                              | 0.0937         |
| <i>VEGFA</i>    | 0.493                        | 0.212                              | 0.169           | 0.148                        | 0.212                              | 1              |

**Supplementary Table 6: Soluble factor levels measured for MSC(AT) under licensed conditions.** All data values are in units of pg/mL. Values represent the mean of two technical replicate wells. 2D-N: 2D normoxic, 2D-H: 2D hypoxic, 3D-N: 3D normoxic, D: donor.

| <b>Culture Condition</b> | <b>Donor ID</b> | <b>TGF-<math>\beta</math></b> | <b>Ang1</b> | <b>VEGF</b> | <b>HGF</b> | <b>PD-L2</b> | <b>IL-1RA</b> | <b>PDGF-AA</b> |
|--------------------------|-----------------|-------------------------------|-------------|-------------|------------|--------------|---------------|----------------|
| 2D-N                     | D1              | 111.42                        | 12.38       | 617.80      | 9.83       | 648.56       | 39.40         | 0.45           |
|                          | D2              | 107.33                        | 16.98       | 368.48      | 37.00      | 529.37       | 39.40         | 3.07           |
|                          | D3              | 116.26                        | 60.40       | 609.28      | 286.55     | 524.20       | 39.40         | 24.42          |
|                          | D4              | 593.73                        | 9.10        | 74.35       | 28.65      | 591.77       | 39.40         | 1.64           |
|                          | D5              | 1013.52                       | 6.75        | 15.20       | 4.40       | 452.24       | 23.10         | 1.01           |
| 2D-H                     | D1              | 78.23                         | 18.03       | 726.55      | 7.30       | 708.86       | 61.78         | 1.56           |
|                          | D2              | 103.06                        | 17.70       | 433.30      | 6.63       | 550.62       | 39.40         | 10.13          |
|                          | D3              | 69.23                         | 80.95       | 942.15      | 77.58      | 520.01       | 39.40         | 58.86          |
|                          | D4              | 1738.44                       | 22.25       | 64.05       | 179.03     | 807.59       | 83.08         | 3.79           |
|                          | D5              | 2135.49                       | 58.23       | 491.63      | 339.63     | 1002.03      | 62.10         | 14.66          |
| 3D-N                     | D1              | 1128.79                       | 12.38       | 479.98      | 511.93     | 472.30       | 114.70        | 3.80           |
|                          | D2              | 1856.83                       | 14.03       | 325.48      | 3551.93    | 434.52       | 373.38        | 28.55          |
|                          | D3              | 1517.53                       | 70.70       | 576.18      | 5736.73    | 414.27       | 138.85        | 116.68         |
|                          | D4              | 2750.45                       | 40.73       | 104.15      | 8082.70    | 528.44       | 541.48        | 21.73          |
|                          | D5              | 2417.04                       | 46.03       | 226.15      | 3303.23    | 532.72       | 693.55        | 41.07          |



**Supplementary Table 7: Soluble factor levels measured for MSC(AT) under unlicensed conditions.** All data values are in units of pg/mL. Values represent the mean of two technical replicate wells. 2D-N: 2D normoxic, 2D-H: 2D hypoxic, 3D-N: 3D normoxic, D: donor.

| <b>Culture Condition</b> | <b>Donor ID</b> | <b>TGF-<math>\beta</math></b> | <b>Ang1</b> | <b>VEGF</b> | <b>HGF</b> | <b>PD-L2</b> | <b>PDGF-AA</b> |
|--------------------------|-----------------|-------------------------------|-------------|-------------|------------|--------------|----------------|
| 2D-N                     | D1              | 138.48                        | 19.18       | 1035.88     | 8.05       | 955.69       | 1.17           |
|                          | D2              | 85.54                         | 14.35       | 350.88      | 20.30      | 427.44       | 5.30           |
|                          | D3              | 96.14                         | 70.15       | 919.28      | 185.13     | 507.20       | 48.11          |
|                          | D4              | 289.42                        | 18.78       | 250.58      | 7.00       | 532.60       | 2.48           |
|                          | D5              | 448.12                        | 42.20       | 617.85      | 15.85      | 519.10       | 11.10          |
| 2D-H                     | D1              | 675.93                        | 20.75       | 782.55      | 20.75      | 828.29       | 0.75           |
|                          | D2              | 752.90                        | 29.13       | 420.65      | 135.30     | 534.55       | 6.25           |
|                          | D3              | 890.42                        | 123.60      | 1463.65     | 965.05     | 765.77       | 50.08          |
|                          | D4              | 893.08                        | 65.25       | 461.83      | 7.88       | 698.95       | 4.90           |
|                          | D5              | 1196.66                       | 65.90       | 901.58      | 36.08      | 752.62       | 20.96          |
| 3D-N                     | D1              | 866.31                        | 17.75       | 1252.80     | 207.33     | 501.52       | 4.18           |
|                          | D2              | 1098.27                       | 13.80       | 555.98      | 449.48     | 424.14       | 44.59          |
|                          | D3              | 1070.39                       | 88.05       | 1108.13     | 2682.58    | 420.43       | 177.28         |
|                          | D4              | 1292.81                       | 34.68       | 817.40      | 509.60     | 420.42       | 25.04          |
